# Supplementary material for: CRISPR‐Mediated Expression of the Fetal Scn5a Isoform in Adult Mice Causes Conduction Defects and Arrhythmias
Source: PubMed Central journal article supplement — J Am Heart Assoc. 2018 Sep 28;7(19):e010393. doi: 10.1161/JAHA.118.010393 (PMC6404881; doi:10.1161/jaha.118.010393), 2018-09-28
Supplement: JAH3-7-e010393-s010.pdf [file JAH3-7-e010393-s010.pdf]

# **SUPPLEMENTAL MATERIAL**

## Supplemental Video Legends:

**Video S1. Optical mapping of electrical conduction in wild type mice.**

**Video S2. Optical mapping of electrical conduction in *Scn5a*<sup>Δe6B/Δe6B</sup> mice with AV block and early afterdepolarizations.**

**Video S3. Optical mapping of electrical conduction in *Scn5a*<sup>Δe6B/Δe6B</sup> mice with early afterdepolarizations.**

**Video S4. Optical mapping of electrical conduction in *Scn5a*<sup>Δe6B/Δe6B</sup> mice with premature atrial complex.**

**Video S5. Optical mapping of electrical conduction in *Scn5a*<sup>Δe6B/+</sup> mice at baseline with prolonged action potential duration.**

**Video S6. Optical mapping of electrical conduction in WT mice with programmed electrical stimulation.**

**Video S7. Optical mapping of electrical conduction in *Scn5a*<sup>Δe6B/Δe6B</sup> mice with programmed electrical stimulation.**

**Video S8. Optical mapping of electrical conduction in *Scn5a*<sup>Δe6B/Δe6B</sup> mice with programmed electrical stimulation showing AV block and EADs.**

**Video S9. Optical mapping of electrical conduction in *Scn5a*<sup>Δe6B/+</sup> mice with programmed electrical stimulation showing AV block.**
